# Supplementary material for: Pain assessment tools in paediatric palliative care: A systematic review of psychometric properties and recommendations for clinical practice
Source: PubMed Central journal article supplement (PMC8796159; doi:10.1177/02692163211049309), 2021-12-29
Supplement: sj-pdf-2-pmj-10.1177_02692163211049309.pdf [file sj-pdf-2-pmj-10.1177_02692163211049309.pdf]

Supplementary Table 2. Methodological Quality and Measurement Property Results

A. Content validity and internal structure

| Measure | Country (language)                                         | age group | Content validity                       |                                                                                                                                                                                                       |        | Structural validity (% variance explained) |                                                          |                                                                      | Cross-cultural validity |                                                                                                                                      |                                           | Internal consistency |            |                                    |   |                                     |        |
|---------|------------------------------------------------------------|-----------|----------------------------------------|-------------------------------------------------------------------------------------------------------------------------------------------------------------------------------------------------------|--------|--------------------------------------------|----------------------------------------------------------|----------------------------------------------------------------------|-------------------------|--------------------------------------------------------------------------------------------------------------------------------------|-------------------------------------------|----------------------|------------|------------------------------------|---|-------------------------------------|--------|
|         |                                                            |           | n                                      | Result                                                                                                                                                                                                | Rating | Meth qual                                  | n                                                        | Result                                                               | Rating                  | Meth qual                                                                                                                            | n                                         | Result (rating)      | Rating     | Meth qual                          | n | Result (Cronbach alpha coefficient) | Rating |
| APPT    | Portugal (Portuguese)                                      | 8-17      | 24 children                            | Relevance and comprehensibility (patients): assessed with the Q-sort method, 58 words were known by >75% of children, comprehensiveness not assessed.                                                 | +      | Doubtful                                   |                                                          |                                                                      |                         | 3 Portuguese native reviewers; 2 English native translators                                                                          | independent translation, back-translation | ?                    | Inadequate |                                    |   |                                     |        |
|         | Turkey (Turkish)                                           | 8-17      | 10 paediatric pain experts             | Relevance (expert): Content validity index (CVI) = 0.8-1.0 (+)                                                                                                                                        | +      | Adequate                                   |                                                          |                                                                      |                         |                                                                                                                                      |                                           |                      |            |                                    |   |                                     |        |
|         | (Özalp Gerçeker et al., 2018)                              |           | 10 children or adolescents with cancer | Relevance and comprehensibility (patients): assessed with the Q-sort method, 89% of 63 words categorised as "I use this word to describe hurt/ pain" by participants, comprehensiveness not assessed. | +      | Doubtful                                   |                                                          |                                                                      | 5 language experts      | independent translation, back-translation, experts committee were used to provide cross-cultural validity in the development process | +                                         | Doubtful             | 96         | APPT-T $\alpha=0.78$               | + | Adequate                            |        |
| COMFORT | United States (English)                                    | n.r.      | 20 experienced clinicians              | Experts were only involved before development of scale, relevance and comprehensibility were not explicitly consulted, patients were not involved in content validation.                              | +      | Inadequate                                 | 50                                                       | PCA: Dimension 1 & 2 (84%)<br>Dimension 1 (58%)<br>Dimension 2 (26%) | +                       | Adequate                                                                                                                             |                                           |                      | 50         | $\alpha=0.90$                      | + | Very good                           |        |
|         | The Netherlands (English)                                  | 0-3       |                                        |                                                                                                                                                                                                       |        |                                            |                                                          |                                                                      |                         |                                                                                                                                      |                                           |                      | 158        | $\alpha=0.90, 0.92, 0.92$          | + | Very good                           |        |
|         | (van Dijk et al., 2000)                                    |           |                                        |                                                                                                                                                                                                       |        |                                            |                                                          |                                                                      |                         |                                                                                                                                      |                                           |                      |            |                                    |   |                                     |        |
| CPI     | United States (English/Spanish determined by language use) | 3-15.9    |                                        |                                                                                                                                                                                                       |        |                                            |                                                          |                                                                      |                         |                                                                                                                                      |                                           |                      | 35         | $\alpha=0.80$ in Anglo children    | + |                                     |        |
|         | (Pfefferbaum et al., 1990, Adams, 1988, Adams, 1989)       |           |                                        |                                                                                                                                                                                                       |        |                                            |                                                          |                                                                      |                         |                                                                                                                                      |                                           |                      | 43         | $\alpha=0.72$ in Hispanic children | + | Adequate                            |        |
| DEGR    | France (French)                                            | 2-6       |                                        |                                                                                                                                                                                                       |        | 80                                         | Factor 1 (51%)<br>Factor 2 (13,14%)<br>Factor 3 (8, 10%) | +                                                                    | Doubtful                |                                                                                                                                      |                                           |                      |            |                                    |   |                                     |        |



|            |                                 |          |                                                          |                                                                                                            |   |            |  |  |     |                                                |   |          |
|------------|---------------------------------|----------|----------------------------------------------------------|------------------------------------------------------------------------------------------------------------|---|------------|--|--|-----|------------------------------------------------|---|----------|
| OMDQ       |                                 |          |                                                          |                                                                                                            |   |            |  |  |     |                                                |   |          |
| OPS        |                                 |          |                                                          |                                                                                                            |   |            |  |  |     |                                                |   |          |
| Pain Squad | Canada (English)                | 8-18     | 10 paediatric oncologists<br>10 paediatric pain experts  | Development (expert): expert opinion was used to develop the tool (+)                                      | + | Doubtful   |  |  | 92  | 8-18 (N=92)<br>$\alpha = 0.96$                 | + | Adequate |
|            | (Stinson et al., 2015)          |          | 18 adolescents with cancer                               | Relevance (patients): 88% of questions rated as "important" or "very important" by >50% of adolescents (+) | + | Doubtful   |  |  |     |                                                |   |          |
| PBCL       | United States (English/Spanish) | 3-15.9   |                                                          |                                                                                                            |   |            |  |  | 35  | $\alpha=0.78$ in Anglo children                | + | Adequate |
|            | (Pfefferbaum et al., 1990)      |          |                                                          |                                                                                                            |   |            |  |  | 43  | $\alpha=0.54$ in Hispanic children             | - | Adequate |
| PCT        |                                 |          |                                                          |                                                                                                            |   |            |  |  |     |                                                |   |          |
| PII        | United States (English)         | 6.6-24.1 |                                                          |                                                                                                            |   |            |  |  | 60  | $\alpha = 0.84$                                | + | Adequate |
| PII-P      | United States (English)         | 6.6-24.1 |                                                          |                                                                                                            |   |            |  |  | 65  | $\alpha = 0.94$ (mothers) and $0.96$ (fathers) | + | Adequate |
| PPP        | Brazil (Brazilian Portuguese)   | 1-18     | 20 health professionals<br>10 primary caregivers/parents | Clarity: median between 3.00 (clear) and 4.00 (very clear); mean= 3.49, SD = 0.82) (+)                     | + | Inadequate |  |  |     |                                                |   |          |
|            | (Pasin et al., 2013)            |          |                                                          |                                                                                                            |   |            |  |  | 45  | $\alpha = 0.864$                               | + | Adequate |
|            |                                 |          |                                                          |                                                                                                            |   |            |  |  |     |                                                |   |          |
|            | United Kingdom (English)        | 1-18     |                                                          |                                                                                                            |   |            |  |  | 29  | $\alpha = 0.88$                                | + | Adequate |
|            | (Hunt et al., 2007)             |          |                                                          |                                                                                                            |   |            |  |  |     |                                                |   |          |
|            | United Kingdom (English)        | 1-18     |                                                          |                                                                                                            |   |            |  |  | 140 | $\alpha = 0.75-0.89$                           | + | Adequate |





|       |                                                   |                |                              |                                                                                   |                                                                                                                                                      |           |           |                                                                                                                                                      |                                                                                                                                                                             |           |           |
|-------|---------------------------------------------------|----------------|------------------------------|-----------------------------------------------------------------------------------|------------------------------------------------------------------------------------------------------------------------------------------------------|-----------|-----------|------------------------------------------------------------------------------------------------------------------------------------------------------|-----------------------------------------------------------------------------------------------------------------------------------------------------------------------------|-----------|-----------|
|       |                                                   | Parent anxiety | 35                           | <b>Divergent validity: Significant</b><br>r =0.51, p<0.01 in Anglo children       | -                                                                                                                                                    | Very good |           |                                                                                                                                                      |                                                                                                                                                                             |           |           |
|       |                                                   |                | 43                           | <b>Divergent validity: Not significant</b><br>r=not reported in Hispanic children | -                                                                                                                                                    | Very good |           |                                                                                                                                                      |                                                                                                                                                                             |           |           |
|       | France (French)<br>(Gauvain-Piquard et al., 1987) | 2-6            |                              |                                                                                   |                                                                                                                                                      |           | 80        | Interrater agreement:<br>K=0.14-0.60, significantly different from 0, <0.7; agreement was better for auxiliaries (0.32-0.60) than nurses (0.14-0.53) | -                                                                                                                                                                           | Very good |           |
| DEGR  | France (French)<br>(Gauvain-Piquard et al., 1999) | 2-6            | pain specialists' ratings    | 53                                                                                | <b>Convergent validity: Significant</b><br>r = 0.74-0.87, p<0.001                                                                                    | +         | Very good | 152                                                                                                                                                  | Interrater agreement:<br>significant weighted kappa coefficients for all items, p<0.001, varied from 0.28-0.45, weighted kappa coefficient for total DEGR score = 0.71> 0.7 | +         | Very good |
|       |                                                   |                | gender                       | 152                                                                               | <b>Divergent validity: Not significant</b><br>r = not reported, p >0.05                                                                              | -         | Very good |                                                                                                                                                      |                                                                                                                                                                             |           |           |
|       |                                                   |                | age                          | 152                                                                               | <b>Divergent validity: Not significant</b><br>r = not reported, p >0.05                                                                              | -         | Very good |                                                                                                                                                      |                                                                                                                                                                             |           |           |
|       |                                                   |                | psychosocial characteristics | 152                                                                               | <b>Divergent validity: Not significant</b><br>r = not reported, p >0.05                                                                              | -         | Very good |                                                                                                                                                      |                                                                                                                                                                             |           |           |
|       |                                                   |                | medical characteristics      | 152                                                                               | <b>Divergent validity: Not significant</b><br>r = not reported, p >0.05                                                                              | -         | Very good | 53                                                                                                                                                   | Interspecialist agreement: K=0.4 (4 specialists)                                                                                                                            | -         | Doubtful  |
|       | France (French)<br>(Marec-Berard et al., 2015)    | 2-6            | HEDEN                        | 59                                                                                | <b>Convergent validity:</b><br>r = 0.50                                                                                                              | -         | Very good |                                                                                                                                                      |                                                                                                                                                                             |           |           |
|       |                                                   |                | HEDEN                        | 48                                                                                | <b>Convergent validity:</b><br>r = 0.6                                                                                                               | -         | Very good |                                                                                                                                                      |                                                                                                                                                                             |           |           |
| DOLLS | Lebanon (Arabic)<br>(Badr Zahr et al., 2006)      | 4-10           | Scores before procedure      | 45                                                                                | <b>Divergent validity: Significant</b><br>t = 12.45, p<0.01                                                                                          | +         | Very good | WBS 45                                                                                                                                               | <b>Concurrent validity: Significant</b><br>r = 0.90, p<0.01                                                                                                                 | +         | Very good |
|       |                                                   |                | heart rate                   | 45                                                                                | <b>Convergent validity: Significant</b><br>r = 0.78, 0.89, 0.74, p<0.001                                                                             | +         | Very good |                                                                                                                                                      |                                                                                                                                                                             |           |           |
|       |                                                   |                | systolic blood pressure      | 45                                                                                | <b>Convergent validity: Significant</b><br>r = 0.75, 0.81, 0.79 p<0.001                                                                              | +         | Very good |                                                                                                                                                      |                                                                                                                                                                             |           |           |
|       |                                                   |                | oxygen saturation            | 45                                                                                | <b>Convergent validity: no correlation</b><br>DOLLS and are not correlated                                                                           | -         | Very good |                                                                                                                                                      |                                                                                                                                                                             |           |           |
|       |                                                   |                | OSBD-R (parents)             | 45                                                                                | <b>Convergent validity: Significant</b><br>r = 0.76, p<0.01                                                                                          | +         | Very good |                                                                                                                                                      |                                                                                                                                                                             |           |           |
|       |                                                   |                | WBS (parents)                | 45                                                                                | <b>Convergent validity: Significant</b><br>r = 0.81, p<0.01                                                                                          | +         | Very good |                                                                                                                                                      |                                                                                                                                                                             |           |           |
|       |                                                   |                | FLACC (nurses)               | 45                                                                                | <b>Convergent validity: Significant</b><br>r = 0.82, p<0.01                                                                                          | +         | Very good |                                                                                                                                                      |                                                                                                                                                                             |           |           |
|       |                                                   |                | OSBD-R (nurses)              | 45                                                                                | <b>Convergent validity: Significant</b><br>r = 0.80, p<0.01                                                                                          | +         | Very good |                                                                                                                                                      |                                                                                                                                                                             |           |           |
| FLACC | United States (English)                           | <1-7           | postanalgesia scores         | 89                                                                                | <b>Divergent validity: Significant</b><br>Preanalgesia FLACC scores (7.0+/-2.9) are significantly higher than that postanalgesia at 10, 30, 60: (1.7 | +         | Adequate  | 89                                                                                                                                                   | Interrater agreement:<br>r = 0.94, kappa value >0.5;<br>face: kappa = 0.52;<br>legs: kappa = 0.67;                                                                          | +         | Very good |







|        |                               |                     |                               |     |                                                                                                  |   |           |  |                   |    |                                                                                                                                                        |   |           |                                                                     |                                                                                                                                                                  |          |          |  |  |
|--------|-------------------------------|---------------------|-------------------------------|-----|--------------------------------------------------------------------------------------------------|---|-----------|--|-------------------|----|--------------------------------------------------------------------------------------------------------------------------------------------------------|---|-----------|---------------------------------------------------------------------|------------------------------------------------------------------------------------------------------------------------------------------------------------------|----------|----------|--|--|
|        | use)                          | 1989<br>Faces Scale |                               |     |                                                                                                  |   |           |  |                   |    |                                                                                                                                                        |   |           |                                                                     |                                                                                                                                                                  |          |          |  |  |
|        | (Pfefferbaum et al., 1990)    |                     | CPI                           | 35  | <b>Convergent validity:</b><br>r=0.66, P<0.001 in Anglo children                                 | - | Very good |  |                   |    |                                                                                                                                                        |   |           |                                                                     |                                                                                                                                                                  |          |          |  |  |
|        |                               |                     |                               | 43  | <b>Convergent validity:</b><br>r=0.64, P<0.001 in Hispanic children                              | - | Very good |  |                   |    |                                                                                                                                                        |   |           |                                                                     |                                                                                                                                                                  |          |          |  |  |
|        | United States (English)       | 6-18                | Patient self-rating of pain   | 22  | <b>Convergent validity: significant</b><br>r=0.49, 0.53, 0.21, p<0.001, P<0.001, not significant | - | Doubtful  |  |                   |    |                                                                                                                                                        |   |           | 22                                                                  | <b>Interrater agreement:</b><br>r = 0.64, 0.80, 0.86, p <.01                                                                                                     | ?        | Doubtful |  |  |
|        | (LeBaron and Zeltzer, 1984)   |                     | Observer rating of pain       | 22  | <b>Convergent validity: significant</b><br>r=0.42, 0.64, 0.45, p<0.001                           | - | Doubtful  |  |                   |    |                                                                                                                                                        |   |           |                                                                     |                                                                                                                                                                  |          |          |  |  |
| PCT    | United States (English)       | 5-13                | WBS (parent)                  | 30  | <b>Convergent validity:</b><br>Kendall's = 0.7 (PCT parent)<br>P=0.0001                          | + | Doubtful  |  |                   |    |                                                                                                                                                        |   | 30        | <b>Interrater agreement:</b><br>not significant, value not reported | ?                                                                                                                                                                | Doubtful |          |  |  |
|        | (West et al., 1994)           |                     | OPS (nurse)                   | 30  | <b>Convergent validity:</b><br>Kendall's = 0.0.27 (PCT patient)<br>P=0.09                        | - | Doubtful  |  | WBS               | 30 | <b>Concurrent validity: significant</b><br>Kendall's=0.67, P=0.0001                                                                                    | - | Doubtful  | 30                                                                  | <b>Intrater agreement:</b><br>Kendall's = 0.23, p=0.16                                                                                                           | ?        | Doubtful |  |  |
| PII    | United States (English)       | 6.6-24.1            | PII-P                         | 60  | <b>Concurrent validity:</b><br>r = 0.62, P<0.0001                                                | - | Very good |  |                   |    |                                                                                                                                                        |   |           |                                                                     |                                                                                                                                                                  |          |          |  |  |
|        | (Martin et al., 2015)         |                     |                               |     |                                                                                                  |   |           |  |                   |    |                                                                                                                                                        |   |           |                                                                     |                                                                                                                                                                  |          |          |  |  |
| PII-P  | United States (English)       | 6.6-24.1            |                               |     |                                                                                                  |   |           |  | PII (self-report) | 60 | <b>Concurrent validity:</b><br>r = 0.62, P<0.0001                                                                                                      | - | Very good |                                                                     |                                                                                                                                                                  |          |          |  |  |
|        | (Martin et al., 2015)         |                     |                               |     |                                                                                                  |   |           |  |                   |    |                                                                                                                                                        |   |           |                                                                     |                                                                                                                                                                  |          |          |  |  |
|        | United Kingdom (English)      | 1-18                |                               |     |                                                                                                  |   |           |  |                   |    |                                                                                                                                                        |   |           | 140                                                                 | <b>Interrater agreement:</b><br>ICC=0.74-0.89                                                                                                                    | +        | Adequate |  |  |
|        | (Hunt et al., 2004)           |                     |                               |     |                                                                                                  |   |           |  |                   |    |                                                                                                                                                        |   |           |                                                                     |                                                                                                                                                                  |          |          |  |  |
| PPP    | United Kingdom (English)      | 1-18                | Saliva cortisol concentration | 29  | <b>Concurrent validity:</b><br>rs=0.375-0.451                                                    | - | Very good |  | NRS               | 29 | <b>Concurrent validity:</b><br>r = 0.91                                                                                                                | + | Very good | 3                                                                   | <b>Interrater agreement:</b><br>ICC= 0.62 (95%CI: 0.54-0.70) for a single rater; 0.83 (95%CI:0.78-0.88); range: 0.21-0.71, average: 0.45                         | +        | Adequate |  |  |
|        | (Hunt et al., 2007)           |                     |                               |     |                                                                                                  |   |           |  |                   |    |                                                                                                                                                        |   |           |                                                                     | <b>Intrater agreement</b><br>ICC=0.90 (95%CI: 0.80-0.95, range: 0.21-1.0, average: 0.72)                                                                         | +        | Adequate |  |  |
|        | Brazil (Brazilian Portuguese) | 1-18                |                               |     |                                                                                                  |   |           |  |                   |    |                                                                                                                                                        |   |           |                                                                     | <b>test-retest:</b><br>Adequate stability over time: no significant difference between test and retest (P = 0.271)                                               | -        | Doubtful |  |  |
|        | (Pasin et al., 2013)          |                     |                               |     |                                                                                                  |   |           |  |                   |    |                                                                                                                                                        |   |           |                                                                     |                                                                                                                                                                  |          |          |  |  |
| RPS    | Canada (English)              | 5-10                |                               |     |                                                                                                  |   |           |  | FPS-R             | 49 | <b>Concurrent validity:</b><br>r = 0.96 (first), 0.97 (second), 0.93 (third) clinic visit<br>κ = 1.0 (first), 0.95 (second), 0.87 (third) clinic visit | + | Very good | 49                                                                  | <b>Interrater agreement:</b><br>Exact agreement between choices made by the participants on both scales: 92% (first), 91% (second), and 87% (third) clinic visit | +        | Doubtful |  |  |
|        | (Mahon et al., 2015)          |                     |                               |     |                                                                                                  |   |           |  |                   |    |                                                                                                                                                        |   |           |                                                                     |                                                                                                                                                                  |          |          |  |  |
| SSPedi | Canada (English)              | 8-18.7              | SSPedi scores of more and     | 502 | <b>Divergent validity: Significant</b><br>Mean difference = 7.8 (95% CI=6.4 to 9.2)              | + | Very good |  |                   |    |                                                                                                                                                        |   |           | 502                                                                 | <b>test-retest:</b><br>ICC = 0.88 (95% CI=0.82 to 0.92)                                                                                                          | +        | Adequate |  |  |



## References:

1. Fernandes A, Batalha L, Perdigão A, de Campos C, Nascimento L, Jacob E. Cultural Validation of the Adolescent Pediatric Pain Tool (APPT) in portuguese children with cancer. *Revista de Enfermagem Referência*. 2015;4(4):99-105.
2. Özalp Gerçekler G, Bilsin E, Binay Ş, Bal Yılmaz H, Jacob E. Cultural adaptation of the Adolescent Pediatric Pain Tool in Turkish children with cancer. *European Journal of Oncology Nursing*. 2018;34:28-34.
3. Ambuel B, Hamlett KW, Marx CM, Blumer JL. Assessing distress in pediatric intensive care environments: the COMFORT scale. *J Pediatr Psychol*. 1992;17(1):95-109.
4. van Dijk M, de Boer JB, Koot HM, Tibboel D, Passchier J, Duivenvoorden HJ. The reliability and validity of the COMFORT scale as a postoperative pain instrument in 0 to 3-year-old infants. *Pain*. 2000;84(2-3):367-77.
5. Pfefferbaum B, Adams J, Aceves J. The influence of culture on pain in Anglo and Hispanic children with cancer. *J Am Acad Child Adolesc Psychiatry*. 1990;29(4):642-7.
6. Adams J. The assessment of pain related to invasive procedures in Anglo and Hispanic children with cancer. *Journal of the Association of Pediatric Oncology Nurses*. 1988;5(1-2):31.
7. Adams JN. A methodologic study of pain assessment in Anglo and Hispanic children with cancer 1989.
8. Gauvain-Piquard A, Rodary C, Rezvani A, Lemerle J. Pain in children aged 2-6 years: a new observational rating scale elaborated in a pediatric oncology unit--preliminary report. *Pain*. 1987;31(2):177-88.
9. Gauvain-Piquard A, Rodary C, Rezvani A, Serbouti S. The development of the DEGR(R): A scale to assess pain in young children with cancer. *European Journal of Pain*. 1999;3(2):165-76.
10. Marec-Berard P, Gomez F, Combet S, Thibault P, Le Moine P, Bergeron C. HEDEN Pain Scale: A Shortened Behavioral Scale for Assessment of Prolonged Cancer or Postsurgical Pain in Children Aged 2 to 6 Years. *Pediatric Hematology and Oncology*. 2015;32(5):291-303.
11. Da Silva FC, Santos Thuler LC, de Leon-Casasola OA. Validity and reliability of two pain assessment tools in Brazilian children and adolescents. *Journal of Clinical Nursing*. 2011;20(13-14):1842-8.
12. Miro J, Huguet A. Evaluation of reliability, validity, and preference for a pediatric pain intensity scale: the Catalan version of the faces pain scale--revised. *Pain*. 2004;111(1-2):59-64.
13. Collins JJ, Devine TD, Dick GS, Johnson EA, Kilham HA, Pinkerton CR, et al. The measurement of symptoms in young children with cancer: The validation of the memorial symptom assessment scale in children aged 7-12. *Journal of Pain and Symptom Management*. 2002;23(1):10-6.
14. Stinson J, Jibb LA, Nathan PC, Maloney AM, Dupuis L, Gerstle JT, et al. Construct validity and reliability of a multidimensional electronic pain diary for school-aged children and adolescents with cancer. *Pediatric Blood and Cancer*. 2015;62 (Supplement 4):S194.
15. Martin S, Nelson Schmitt S, Wolters PL, Abel B, Toledo-Tamula MA, Baldwin A, et al. Development and Validation of the English Pain Interference Index and Pain Interference Index-Parent Report. *Pain Medicine (United States)*. 2015;16(2):367-73.
16. Pasin S, Avila F, De Cavata T, Hunt A, Heldt E. Cross-cultural translation and adaptation to Brazilian Portuguese of the paediatric pain profile in children with severe cerebral palsy. *Journal of Pain and Symptom Management*. 2013;45(1):120-8.
17. Hunt A, Wisbeach A, Seers K, Goldman A, Crichton N, Perry L, et al. Development of the Paediatric Pain Profile: Role of Video Analysis and Saliva Cortisol in Validating a Tool to Assess Pain in Children with Severe Neurological Disability. *Journal of Pain and Symptom Management*. 2007;33(3):276-89.

18. Hunt A, Goldman A, Seers K, Crichton N, Mastroyannopoulou K, Moffat V, et al. Clinical validation of the paediatric pain profile. *Dev Med Child Neurol.* 2004;46(1):9-18.
19. Mahon P, Holsti L, Siden H, Strahlendorf C, Turnham L, Giaschi D. Using Colors to Assess Pain in Toddlers: Validation of "The Rainbow Pain Scale"—A Proof-of-Principle Study. *Journal of Pediatric Oncology Nursing.* 2015;32(1):40-6.
20. Dupuis LL, Johnston DL, Baggott C, Hyslop S, Tomlinson D, Gibson P, et al. Validation of the symptom screening in pediatrics tool in children receiving cancer treatments. *Journal of the National Cancer Institute.* 2018;110(6):661-8.
21. Van Dijk M, De Boer JB, Koot HM, Duivenvoorden HJ, Passchier J, Bouwmeester N, et al. The association between physiological and behavioral pain measures in 0- to 3-year-old Infants after major surgery. *Journal of Pain and Symptom Management.* 2001;22(1):600-9.
22. Badr Zahr LK, Puzantian H, Abboud M, Abdallah A, Shahine R. Assessing procedural pain in children with cancer in Beirut, Lebanon. *Journal of Pediatric Oncology Nursing.* 2006;23(6):311-20.
23. Merkel SI, Voepel-Lewis T, Shayevitz JR, Malviya S. The FLACC: a behavioral scale for scoring postoperative pain in young children. *Pediatr Nurs.* 1997;23(3):293-7.
24. Manworren RCB, Hynan LS. Practice applications of research. Clinical validation of FLACC: preverbal patient pain scale. *Pediatric Nursing.* 2003;29(2):140-6.
25. Hicks CL, von Baeyer CL, Spafford PA, van Korlaar I, Goodenough B. The Faces Pain Scale-Revised: toward a common metric in pediatric pain measurement. *Pain.* 2001;93(2):173-83.
26. Buchholz M, Karl HW, Pomietto M, Lynn A. Pain scores in infants: a modified infant pain scale versus visual analogue. *Journal of Pain & Symptom Management.* 1998;15(2):117-24.
27. Tomlinson D, Ethier MC, Judd P, Doyle J, Gassas A, Naqvi A, et al. Reliability and construct validity of the oral mucositis daily questionnaire in children with cancer. *European Journal of Cancer.* 2011;47(3):383-8.
28. Manji A, Tomlinson D, Ethier MC, Gassas A, Maloney AM, Sung L. Psychometric properties of the Oral Mucositis Daily Questionnaire for child self-report and importance of mucositis in children treated with chemotherapy. *Supportive Care in Cancer.* 2012;20(6):1251-8.
29. West N, Oakes L, Hinds PS, Sanders L, Holden R, Williams S, et al. Measuring pain in pediatric oncology ICU patients... including commentary by Wong DL. *Journal of Pediatric Oncology Nursing.* 1994;11(2):64-70.
30. LeBaron S, Zeltzer L. Assessment of acute pain and anxiety in children and adolescents by self-reports, observer reports, and a behavior checklist. *J Consult Clin Psychol.* 1984;52(5):729-38.
31. Holdsworth MT, Raisch DW, Winter SS, Chavez CM, Leasure MM, Duncan MH. Differences among raters evaluating the success of EMLA cream in alleviating procedure-related pain in children with cancer. *Pharmacotherapy: The Journal of Human Pharmacology & Drug Therapy.* 1997;17(5):1017-22.
32. Wiener L, Battles H, Zadeh S, Widemann BC, Pao M. Validity, specificity, feasibility and acceptability of a brief pediatric distress thermometer in outpatient clinics. *Psycho-Oncology.* 2017;26(4):461-8.
